# Supplementary material for: Single Molecule Microscopy Reveals an Increased Hyaluronan Diffusion Rate in Synovial Fluid from Knees Affected by Osteoarthritis
Source: PubMed Central journal article supplement (PMC4751503; doi:10.1038/srep21616), 2016-02-12
Supplement: srep21616-s1.pdf [file srep21616-s1.pdf]

## **Supplementary information:**

### **Single Molecule Microscopy Reveals an Increased Hyaluronan Diffusion Rate in Synovial Fluid from Knees Affected by Osteoarthritis**

Kohlhof, Hendrik; Gravius, Sascha; Kohl, Sandro; Ahmad, Sufian S.; Randau, Thomas;  
Schmolders, Jan; Rommelspacher, Yorck; Friedrich, Max; Kaminski, Tim P.

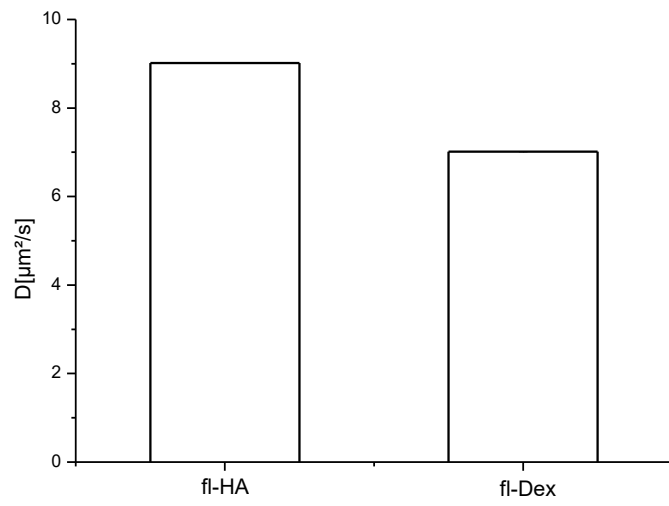

**Supplementary Figure S1.** Diffusion coefficients of fl-HA and fl-Dex in PBS-buffer at 22°C.
